# Supplementary material for: Facile fabrication of a controlled polymer brush-type functional nanoprobe for highly sensitive determination of alpha fetoprotein
Source: Royal Society of Chemistry journal article supplement (doi:10.1039/d0ay01151g), 2020-01-01
Supplement: d0ay01151g1.pdf [file d0ay01151g1.pdf]

## Supporting Information

### **Facile Fabrication of Controlled Polymer Brushes-Type Functional Nanoprobe for Highly Sensitive Determination of Alpha Fetoprotein**

Na Wang<sup>a</sup>, Chan Wang<sup>b</sup>, Hou Chen<sup>a\*</sup>, Liangjiu Bai<sup>a\*</sup>, Wenxiang Wang<sup>a</sup>, Huawei Yang<sup>a</sup>, Donglei Wei<sup>a</sup>, Lixia Yang<sup>a</sup>

<sup>a</sup>Key Laboratory of High Performance and Functional Polymer in the Universities of Shandong Province, Collaborative Innovation Center of Shandong Province for High Performance Fibers and Their Composites; School of Chemistry and Materials Science, Ludong University, Yantai 264025, China.

<sup>b</sup>Yantai Center of Shandong Integrated Technology Transfer Center, Chinese Academy of Sciences, Yantai, Shandong 264003, China.

\*Corresponding author E-mail: [chenhou@ldu.edu.cn](mailto:chenhou@ldu.edu.cn) (H. Chen);  
[bailiangjiu@ldu.edu.cn](mailto:bailiangjiu@ldu.edu.cn) (L. J. Bai)

**Table S1.** Contributions of individual chemical moieties in the high-resolution C 1s spectra of GO and GO composites.

| Samples                    | XPS (atom%)  |            |              |             |            |
|----------------------------|--------------|------------|--------------|-------------|------------|
|                            | C            | O          | N            | Br          | Cu         |
| GO                         | 62.08        | 29.71      | 1.76         | 0           | 0          |
| GO@NH <sub>2</sub>         | 64.92        | 23.72      | 4.24         | 0           | 0          |
| GO@Br                      | 66.07        | 22.33      | 4.39         | 0.36        | 0          |
| GO@PAN                     | 72.55        | 7.48       | 20.01        | 0.19        | 0          |
| GO@PHPY                    | 72.94        | 4.34       | 16.80        | 0.14        | 0          |
| <b>GO@PHPY-<br/>Cu(II)</b> | <b>72.31</b> | <b>4.1</b> | <b>16.22</b> | <b>0.11</b> | <b>1.2</b> |

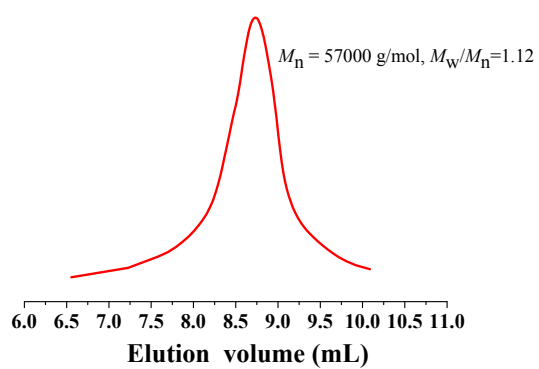

**Fig. S1.** GPC traces of PAN (derived from the homopolymer produced by the sacrificial initiator, polymerization time is 24 h).

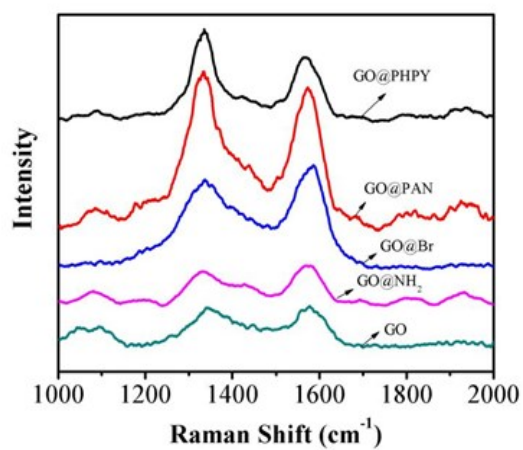

**Fig. S2.** Raman spectra of pristine GO and GO nanocomposites by a laser confocal micro raman spectrometer with a focal length of 700 mm.

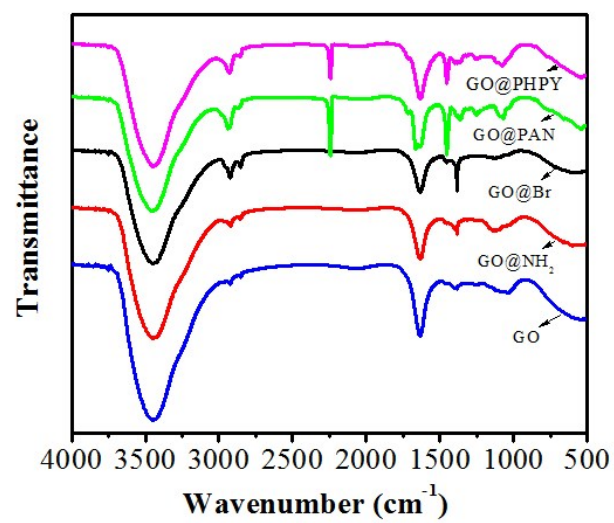

**Fig. S3.** FT-IR spectroscopic analysis GO and GO nanocomposites.

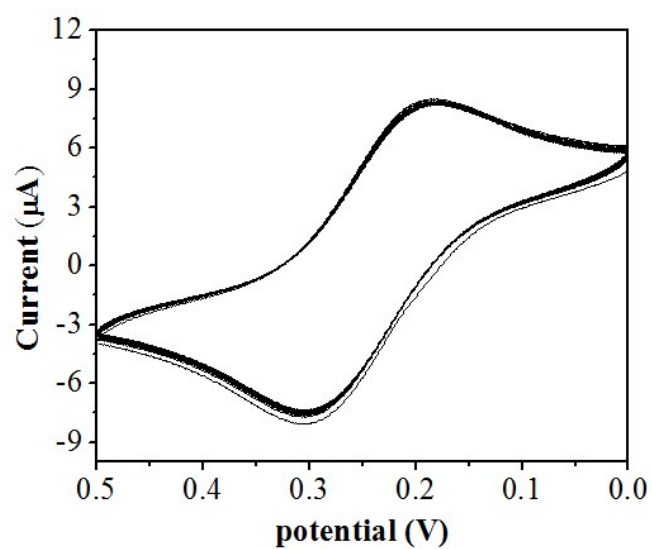

**Fig. S4.** The stability of same electrode cycled 50 times.
